# Supplementary material
Source: PubMed Central journal article supplement (PMC6748096)
Supplement: 41418_2018_203_MOESM1_ESM.pdf [file 41418_2018_203_MOESM1_ESM.pdf]

1   Supplementary Figures

2   Supplementary Figure S1

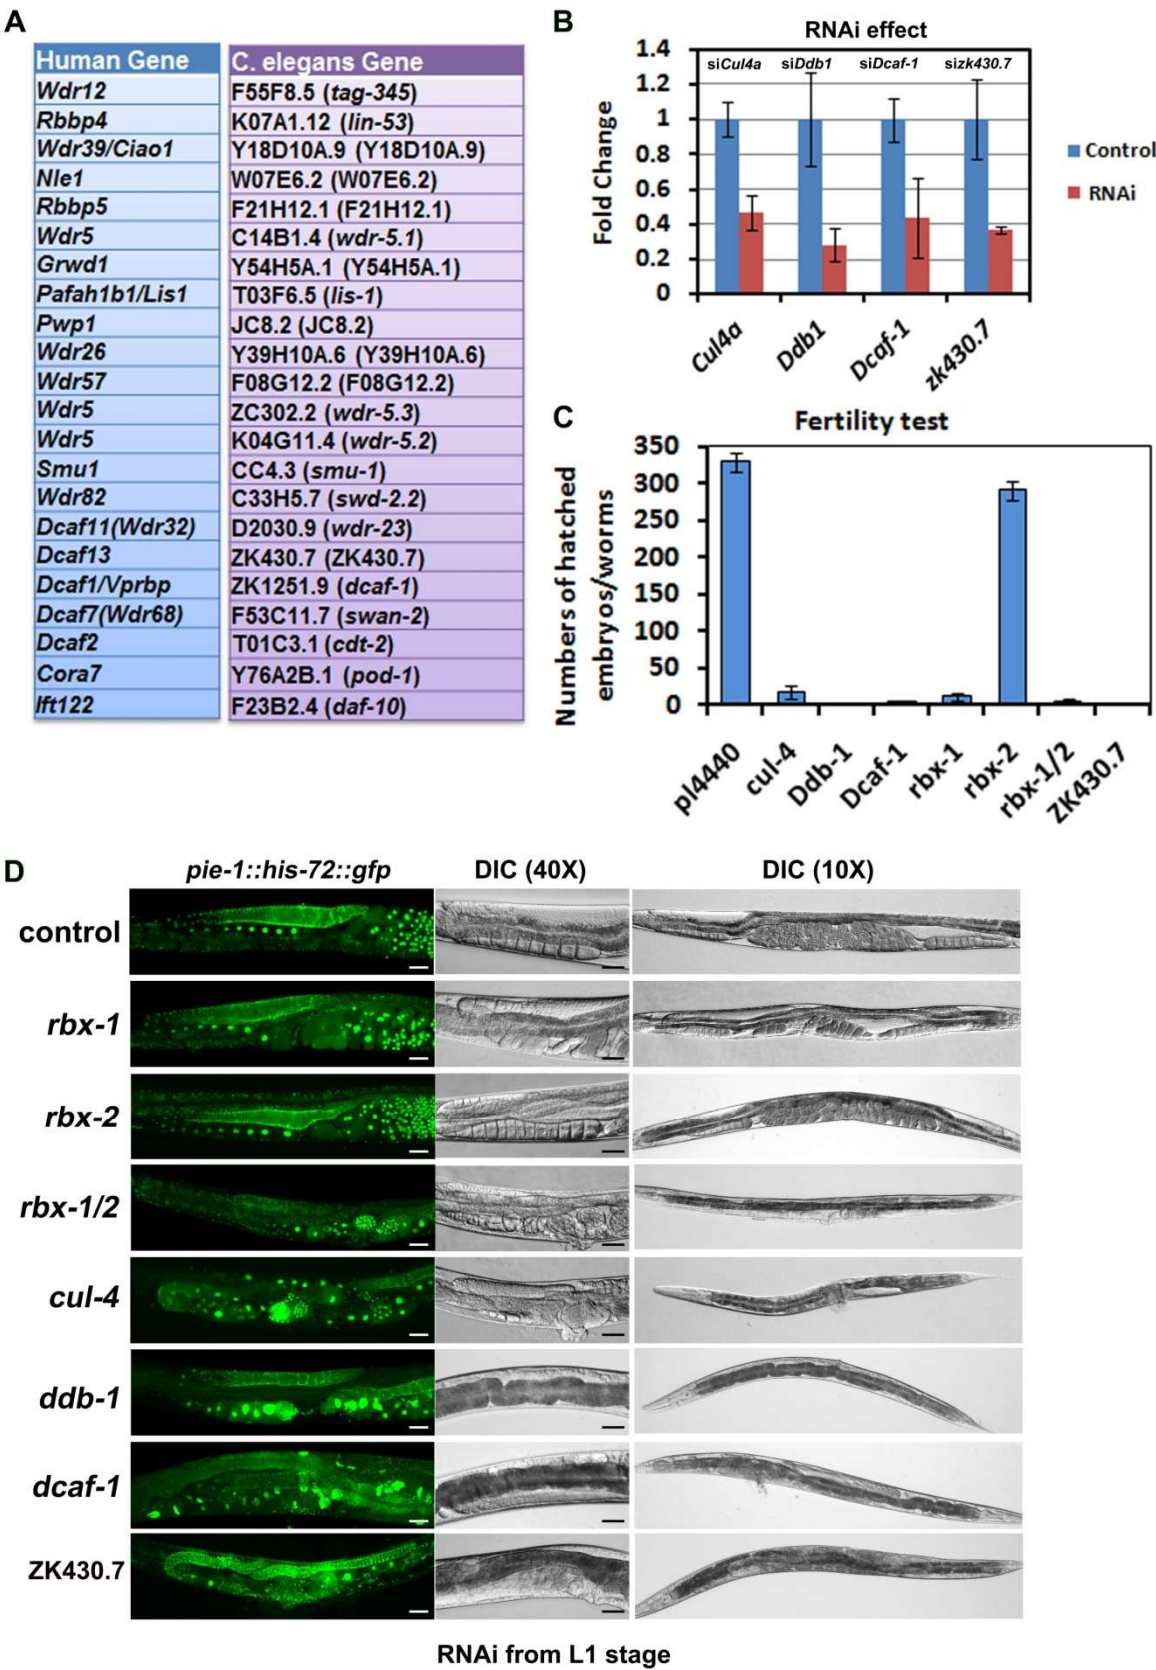

**Supplementary Figure S1: ZK430.7, the homologous gene of *Dcaf13*, is required for oogenesis in *C.elegans*.**

**A:** The gene list showed 19 conserved DCAFs from *C.elegans* to human for RNAi screen. **B:** Quantitative real-time PCR (qRT-PCR) results showing RNAi efficiency of *cul-4*, *ddb-1*, *dcaf-1*, ZK430.7 relative to control *C.elegans*. Error bars indicate SEM. **C:** Fertility assessment of control (pl4440) and RNAi-mediated knockdown of several core components of CRL4 E3 ligase (*cul-4*, *ddb-1*, *rbx-1*, *rbx-2*), *dcaf-1* and *zk430.7*. The numbers of hatched embryos or larvae were counted in the next 72 h after RNAi. Error bars indicate SEM. **D:** Germlines morphologies in *Pie-1::his-72::GFP* transgene worms after RNAi of *cul-4*, *ddb-1*, *dcaf-1*, and *zk430.7*. GFP-histone H2B epifluorescence (left panels) and DIC images (middle and right panels) of *C. elegans* female gonads showed oogenesis after RNAi depletion of indicated genes. Scale bar, 10  $\mu$ m.

18      **Supplementary Figure S2**

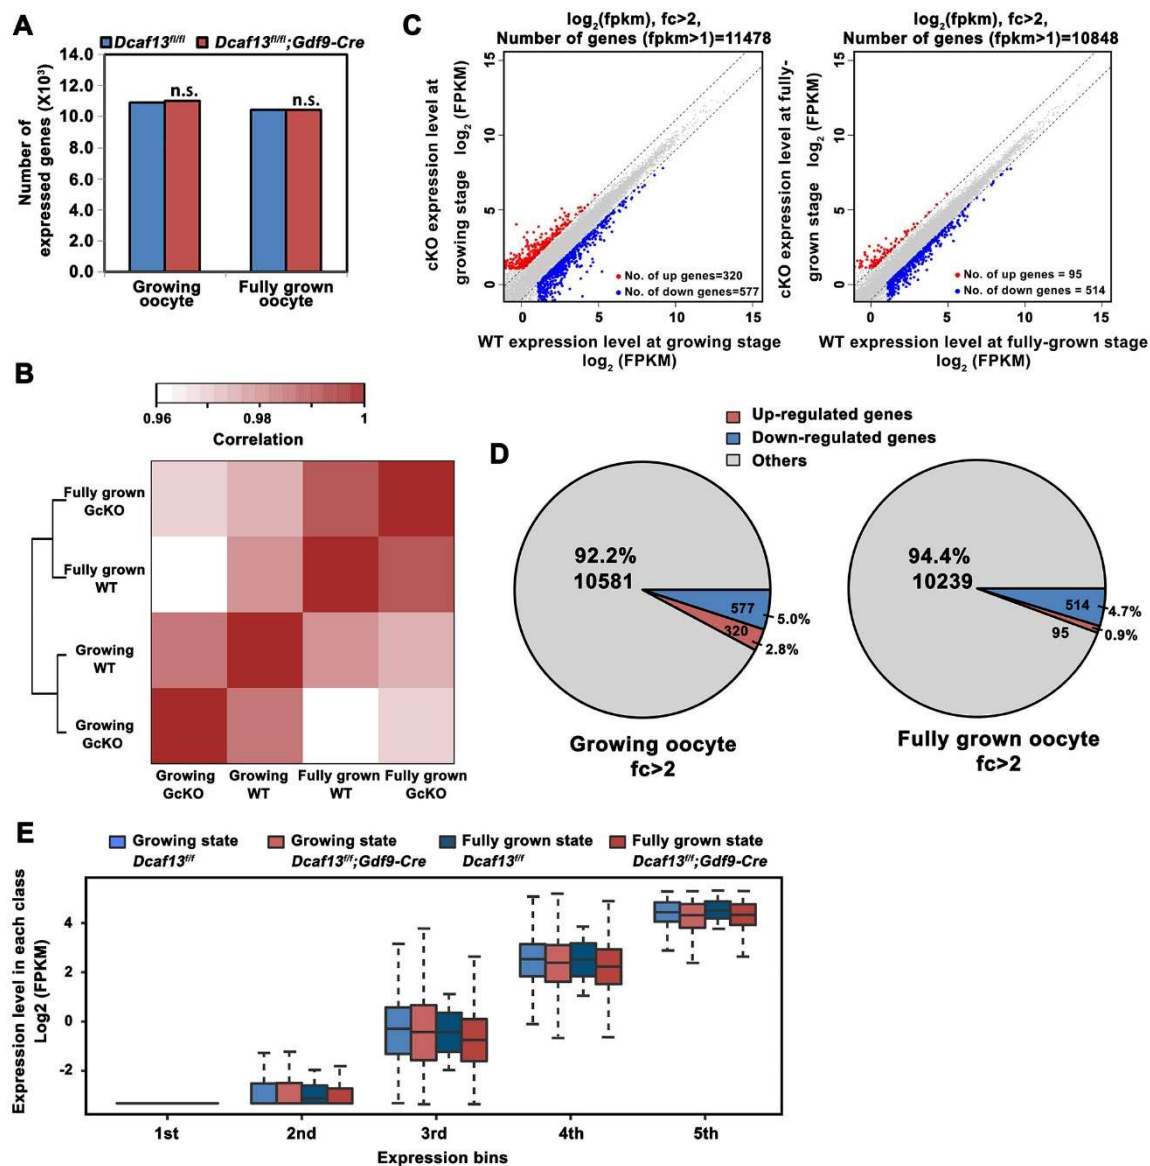

19

20

**Supplementary Figure S2. The level of mRNA transcripts is not altered in DCAF13-deleted oocytes**

**A:** Bar graph showed the number of transcripts in *Dcaf13<sup>fl/fl</sup>* and *Dcaf13<sup>fl/fl</sup>;Gdf9-Cre* oocytes at growing and fully-grown stages. **B:** Heatmap and Cluster tree showed the correlation among 4 samples including growing and fully-grown oocytes (*Dcaf13<sup>fl/fl</sup>* and *Dcaf13<sup>fl/fl</sup>;Gdf9-Cre*). Correlation method: pearson correlation; Cluster method: complete; Correlation test:  $p < 0.01$ . **C:** Scatter plots of RNA-seq data illustrated transcriptional change in *Dcaf13* knocked out oocytes. The left graph for growing oocyte and the right graph for fully-grown oocyte. Genes up-regulated were shown in red dots, while down-regulated genes were shown in blue dots. Genes showing an expression difference larger than two-fold were considered differentially expressed. **D:** Pie chart presentation of the overall genomic distribution of up-regulated genes, down-regulated genes and the others. **E:** Box-plots of the whole genes expression levels in four samples. The expression value (FPKM) was divided into five groups according to their expression levels in *Dcaf13<sup>fl/fl</sup>* fully grown oocytes. The outliers were filtered.

Supplementary Figure S3.

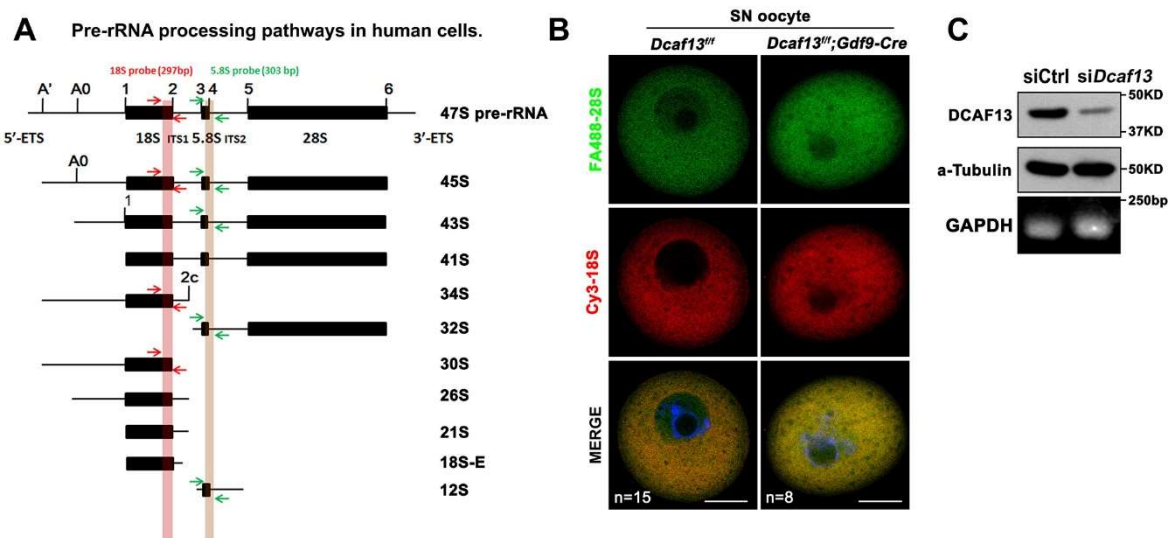

**Supplementary Figure S3. Schematic diagram of pre-rRNA processing pathways and probes used in human and mouse.**

Pol I-transcribed premature rRNA (47S in human) precursor embedded in noncoding spacers: 5' and 3' external transcribed spacers (5' and 3' ETSs) and internal transcribed spacers 1 and 2 (ITS1 and ITS2). Then, the various rRNA intermediates were processed step by step from pre-rRNA following a pathway involving both endo- and exonucleolytic digestions at sites A0, 1, and 2 in nucleolus. **A:** Pre-rRNA processing pathways in human cells. The pink area represented the location of 18S probe and the brown area represents the location of 5.8S probe used for Northern blotting. The probes information was listed in Supplementary Table-1. **B:** Fluorescent *in situ* hybridization (FISH) of antisense oligonucleotide probes recognizing the mouse 28S rRNA (Green) and 18S rRNA (Red) in *Dcaf13<sup>fl/fl</sup>* and *Dcaf13<sup>fl/fl</sup>;Gdf9-Cre* SN oocytes. Scale bars, 25  $\mu$ m. **C:** Western blot showing DCAF13 knockdown efficiency in HeLa cells transfected with non-targeting (*siCtrl*) or *Dcaf13*-targeted siRNA (*siDcaf13*).  $\alpha$ -Tubulin was blotted as a loading control.

53 **Supplementary Table-1.**54 **Primer and probe information**

| Genotyping primers                |               |                                  |                                      |                                                                                      |
|-----------------------------------|---------------|----------------------------------|--------------------------------------|--------------------------------------------------------------------------------------|
| Name                              | Species       | Sequence                         |                                      | Length                                                                               |
| <i>Dcaf13</i><br>GP1              | mouse         | 5'- TACTTGACTGGGTTCCAGATAC-3'    |                                      | WT:<br>212 bp<br>(GP1+GP2)<br>Flox:246 bp<br>(GP1+GP2)<br>KO:<br>464 bp<br>(GP1+GP3) |
| <i>Dcaf13</i><br>GP2              | mouse         | 5'- AGTCACTTACAAACCTTATCAAAAC-3' |                                      |                                                                                      |
| <i>Dcaf13</i><br>GP3              | mouse         | 5'- AACCTTCATGTGCTTGTATTGT-3'    |                                      |                                                                                      |
| <i>Gdf9-<br/>Cre</i>              | mouse         | FP                               | 5'- GGTTTCTGTTGGGCTCTCAC-3'          | 470 bp                                                                               |
|                                   | mouse         | RP                               | 5'- ATCAGAGGTGGCATCCACAG-3'          |                                                                                      |
| <i>Zp3-<br/>Cre</i>               | mouse         | FP                               | 5'- AAGAACCTGATGGACATGTTTCAG-3'      | 470 bp                                                                               |
|                                   | mouse         | RP                               | 5'- CTGATCCTGGCAATTTCGG-3'           |                                                                                      |
| Real time-PCR primers information |               |                                  |                                      |                                                                                      |
| Name                              | Species       | Sequence                         |                                      | Length                                                                               |
| <i>Dcaf13</i>                     | Human         | FP                               | 5'-<br>TTTCCTGTAGACAAAAGTCGAAGCA -3' | 143bp                                                                                |
|                                   | Human         | RP                               | 5'- GCATTAGCTTTCCACAGGCG -3'         |                                                                                      |
| <i>Fbl</i>                        | Mouse         | FP                               | 5'- CAAAATTGAGTACAGAGCCTGGA -3'      | 160bp                                                                                |
|                                   | Human         | RP                               | 5'- CGGGCCGACAATATCAGAGA -3'         |                                                                                      |
| siRNA sense sequence information  |               |                                  |                                      |                                                                                      |
| Name                              | Species       |                                  | Sequence                             |                                                                                      |
| NC                                | Mouse & Human |                                  | 5'- UUCUCCGAACGUGUCACGUTT -3'        |                                                                                      |

|                                                    |               |                                                       |                                  |        |
|----------------------------------------------------|---------------|-------------------------------------------------------|----------------------------------|--------|
| <i>Dcaf13</i>                                      | Mouse & Human | 5'- GUGCUUACAUCACGAGAAATT -3'                         |                                  |        |
| <i>Fbl</i>                                         | Mouse         | 5'- CCTCCCAAGGTGAAGAACT -3'                           |                                  |        |
|                                                    | Mouse         | 5'- CGTCATGAAGGTGTCTTTA -3'                           |                                  |        |
|                                                    | Mouse         | 5'- CCCTGGAGAGTCTGTGTAT -3'                           |                                  |        |
| Oligonucleotide probes used for detection of rRNAs |               |                                                       |                                  |        |
| Antisense probes                                   | Species       | Sequence                                              |                                  | Length |
| 5.8 S                                              | Human         | FP                                                    | 5'- GCTACGCCTGTCTGAGCGTCG -3'    | 303 bp |
|                                                    | Human         | RP                                                    | 5'- CGGCTCTCTCTTTCCCTCTCCG -3'   |        |
| 18S                                                | Human         | FP                                                    | 5'- CGTCGCTACTACCGATTGGATGG -3'  | 297 bp |
|                                                    | Human         | RP                                                    | 5'- AACGAGCGAGCGAACGAACG -3'     |        |
| 18S                                                | Mouse         | FP                                                    | 5'- TGATTAAGTCCCTGCCCTTTG -3'    | 330 bp |
|                                                    | Mouse         | RP                                                    | 5'- CTTCTCTCACCTCACTCCAGACAC -3' |        |
| 28S                                                | Mouse         | FP                                                    | 5'- CGTGTGAGTAAGATCCTCCACC -3'   | 492 bp |
|                                                    | Mouse         | RP                                                    | 5'- GAGTTTACCACCCGCTTTGG -3'     |        |
| Cy3-18S                                            | Mouse         | 5'-Cy3-CCATTATTCCTAGCTGCGGTATCCAGGCGG-3'              |                                  |        |
| AF488-28S                                          | Mouse         | 5'-Alexa Fluor 488-GAGGGAACCAGCTACTAGATGGTTCGATTA -3' |                                  |        |

**Supplementary Table-2.**

**Antibody information**

| <b>Antibody<br/>Name</b> | <b>Company</b> | <b>Cat#NO.</b> | <b>Application</b>                    |
|--------------------------|----------------|----------------|---------------------------------------|
| anti-FLAG                | Santa Cruz     | sc-807         | WB (1:20,00)                          |
| anti-HA tag              | CST            | #3724          | WB (1:20,00)                          |
| anti-DCAF13              | Abcam          | Ab195588       | IHC(1:100)<br>WB (1:20,00); IF(1:200) |
| anti-pS II               | Abcam          | ab5095         | IF(1:200)                             |
| anti-B23                 | Abcam          | ab10530        | IF(1:200)                             |
| anti- Fibrillarin        | Abcam          | ab166630       | IF(1:200)                             |
| anti-ERK1/2              | Santa Cruz     | sc-93          | WB (1:10,000)                         |
| anti-FOXO1               | CST            | #2880S         | IHC (1:100)                           |
| anti-MVH                 | Abcam          | Ab13840        | IHC (1:200)                           |
